# Supplementary material for: Interaction of Microbiota between Fish and the Environment of an In-Pond Raceway System in a Lake
Source: MDPI journal article supplement (doi:10.3390/microorganisms10061143), 2022-06-01
Supplement: s1 [file s1]

## Supplementary Materials

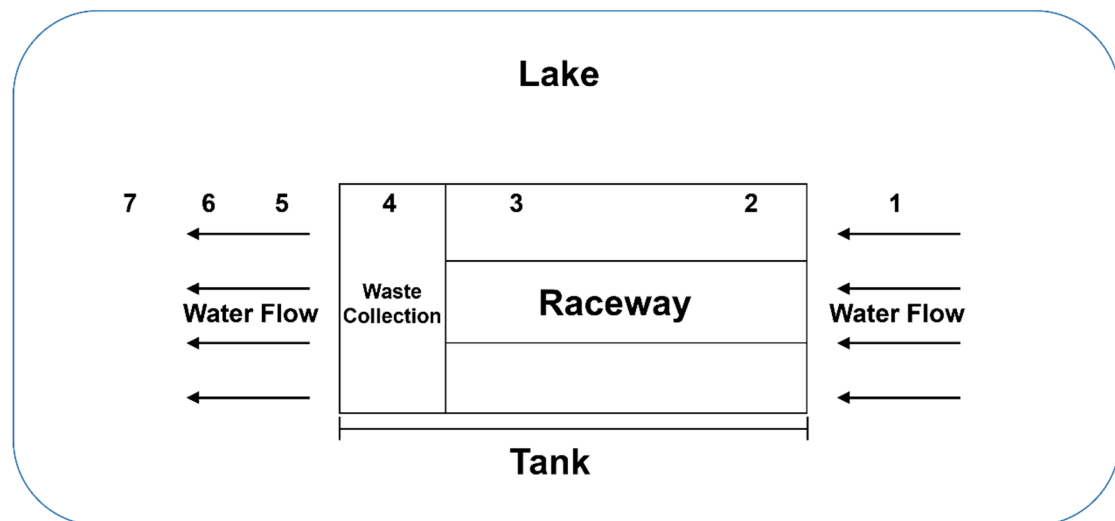

**Figure S1.** Schematic diagram of the IPRS sampling points. Point 6 is the zero flow rate point. Three water samples were collected at each point from 2 to 7, and one sample was collected at point 1. Three sediment samples were collected at points 5 and 6, and one sample was collected at point 1. Regularly salvage residual bait excrement at the bottom, so there is no sediment at points 2, 3, and 4.

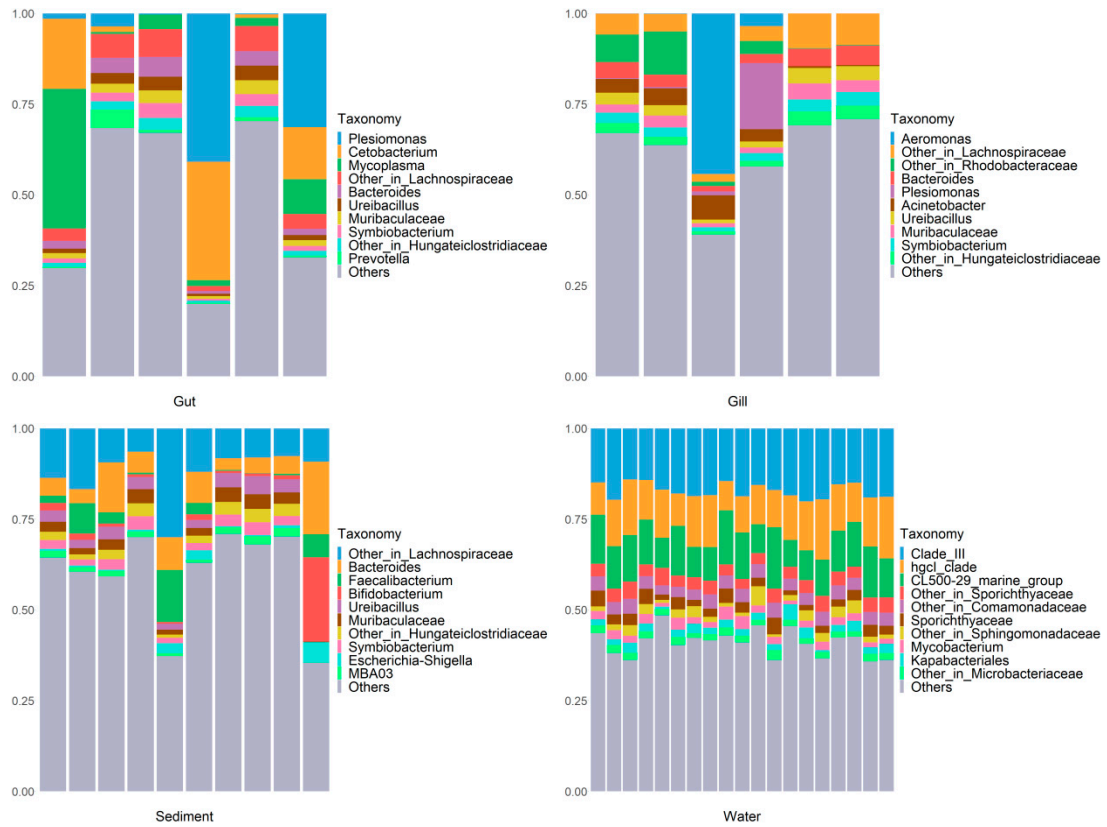

**Figure S2.** Genus-level taxonomic composition of microbes at the fish and environment in the IPRS. Only the top 10 genera with an average proportion are displayed, and the vertical coordinate represents the relative proportion of each genus.

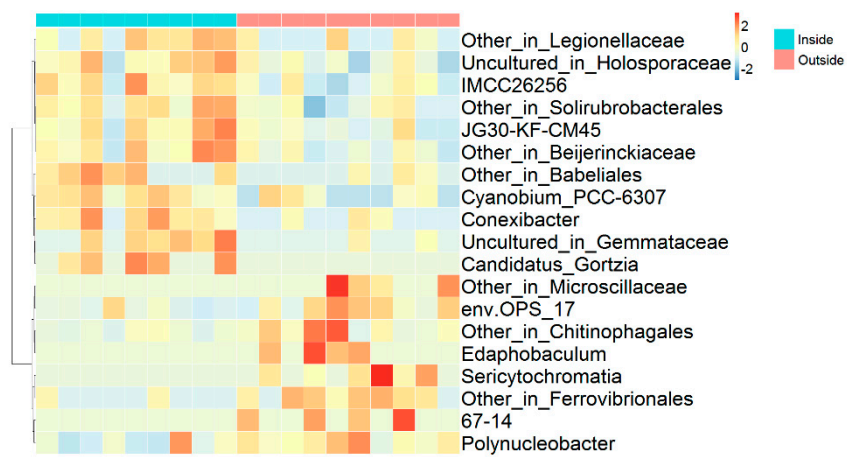

**Figure S3.** Different genus of bacteria in the water environment inside and outside the tank.

**Table S1.** Water quality parameters inside and outside the IPRS.

| Site | NH3N | NO2N | PO4  | TN   | DTN  | DTP  | TP   | COD<br>MN | Chla  | DO    | PH   | NTU   | T     | SD |
|------|------|------|------|------|------|------|------|-----------|-------|-------|------|-------|-------|----|
| 1    | 0.28 | 0.02 | 0.01 | 4.48 | 3.43 | 0.00 | 0.31 | 5.00      | 36.97 | 12.58 | 7.18 | 22.00 | 27.40 | 31 |
| 2    | 1.08 | 0.02 | 0.04 | 5.63 | 3.58 | 0.06 | 0.46 | 7.11      | 36.92 | 6.04  | 7.59 | 31.30 | 24.80 | 22 |
| 3    | 0.77 | 0.02 | 0.01 | 4.74 | 4.69 | 0.07 | 0.33 | 7.03      | 52.84 | 6.11  | 7.68 | 34.60 | 24.80 | 21 |
| 4    | 0.94 | 0.02 | 0.10 | 5.14 | 4.00 | 0.07 | 0.35 | 7.53      | 55.62 | 6.00  | 7.68 | 32.60 | 24.80 | 22 |
| 5    | 1.09 | 0.02 | 0.01 | 5.36 | 4.54 | 0.03 | 0.35 | 7.10      | 61.24 | 6.78  | 7.69 | 29.20 | 25.00 | 20 |
| 6    | 0.69 | 0.02 | 0.14 | 5.30 | 4.95 | 0.11 | 0.32 | 6.46      | 26.30 | 7.33  | 7.72 | 26.90 | 25.40 | 21 |

Note: NH3N, NO2N, PO4, TN, DTN, DTP, TP, CODMN are measured in mg/L; Chla is measured in µg/L;  
T is measured in °C; SD is measured in cm.
